# Supplementary material for: Entwicklung eines Fragebogens zur ökonomischen Erfassung technikbezogener Einstellungen und Selbstwahrnehmungen
Source: Atypon-hosted journal article supplement (doi:10.1026/0012-1924/a000323), 2023-09-18
Supplement: 0012-1924_a000323_esm1.pdf [file 0012-1924_a000323_esm1.pdf]

## Elektronisches Supplement 1. Skalen und Items des TEiSel

Das elektronische Supplement 1 beschreibt die fünf Facetten der Kurzsкала TEiSel („Technikbezogene Einstellungen und Selbstwahrnehmungen“) und fasst die entwickelten Items und ihre deskriptiven Kennwerte in den ESM Tabellen 1.1–1.5 zusammen. Alle für die Itemkonstruktion berücksichtigten Skalen sind in der ESM Tabelle 1.6. aufgeführt.

### 1. Einstellungen gegenüber Technik

*Einstellungen gegenüber Technik* beschreiben allgemeine subjektive Bewertungen von Technik. Laut Modellen wie dem Technology Acceptance Model (TAM; Davis, 1989) und seiner Weiterentwicklung, der Unified Theory of Acceptance and Use of Technology (UTAUT; Venkatesh, Morris, Davis & Davis, 2003), ergeben sich Einstellungen gegenüber einer Technologie oder Technik durch ihre wahrgenommene Nützlichkeit (*perceived usefulness*) und der Einfachheit ihrer Nutzung (*perceived ease of use*). Gebildete Einstellungen beeinflussen folglich die Intention einer Person, Technik zu nutzen, und darüber auch ihre tatsächliche Nutzung (Davis, 1989).

**ESM Tabelle 1.1.** TEiSel-Items zu allgemeinen Einstellungen gegenüber Technik.

| Item                                        | Wortlaut                                                                      | $\alpha$   | $\omega_t$ | $M$         | $SD$        | $r_{it}$ |
|---------------------------------------------|-------------------------------------------------------------------------------|------------|------------|-------------|-------------|----------|
| <b><i>Einstellung gegenüber Technik</i></b> |                                                                               | <b>.66</b> | <b>.75</b> | <b>3.50</b> | <b>0.65</b> |          |
| ET01                                        | Technische Entwicklungen sind wichtig für den gesellschaftlichen Fortschritt. |            |            | 4.08        | 0.83        | .37      |
| ET02                                        | Technische Geräte ermöglichen einen hohen Lebensstandard.                     |            |            | 4.10        | 0.90        | .36      |
| ET03*                                       | Technische Geräte verringern den persönlichen Kontakt zwischen den Menschen.  |            |            | 2.30        | 1.18        | .39      |
| ET04*                                       | Technische Geräte machen vieles umständlicher.                                |            |            | 3.77        | 0.95        | .42      |
| ET05*                                       | Den derzeitigen technischen Entwicklungen stehe ich kritisch gegenüber.       |            |            | 3.24        | 1.14        | .54      |

*Anmerkungen:* Antwortskala 1– *trifft nicht zu* bis 5– *trifft zu*. \* = Item ist invertiert.

Während die Rolle von Einstellungsmaßen als Prädiktor für die Nutzung von Technik vielfach untersucht wurde (z. B. Czaja et al., 2006; Kelley, Morell, Park & Mayhorn, 1999), fehlen insbesondere empirische Belege mit Blick auf tatsächliche Performanz (Wagner, Hassanein & Head, 2010). Ausnahmen finden sich beispielsweise bei Arning und Ziefle

## Elektronisches Supplement 1. Skalen und Items des TEiSel

(2007), die zeigten, dass die wahrgenommene Einfachheit der Nutzung die Performanz im Umgang mit PDA-Geräten beeinflusst, und Schmidt (2017), deren Studie hingegen keinen Einfluss der Technikeinstellung von älteren Personen auf ihren Umgang mit Blutdruckmessgeräten, Mobiltelefonen und E-Book-Readern zeigte. Dass die wahrgenommene Einfachheit der Nutzung und die wahrgenommene Nützlichkeit auch von Selbstwahrnehmungen abhängen, wird in Technikakzeptanzmodellen nur über Beziehungen zu externen Variablen angedeutet (Davis, Bagozzi & Warshaw, 1989).

### 2. Selbstwahrnehmungen kognitiver Komponenten

Das *technikbezogene Kompetenzerleben* beschreibt Überzeugungen über eigene Fähigkeiten im Umgang mit Technik und kann in diesem Sinn als ein bereichsspezifisches Selbstkonzept aufgefasst werden. In bisherigen Arbeiten finden sich verschiedene Operationalisierungsvarianten. Beispiele sind die 4-Item-Subskala Kompetenz aus dem Fragebogen zur Technikbereitschaft von Neyer, Felber und Gebhardt (2012), eine 4-Item-Skala zur Einschätzung der eigenen Kompetenz im Umgang mit elektronischen Geräten von Karrer, Glaser, Clemens und Bruder (2009) oder eine 17-Item-Skala zur Kompetenzeinschätzung im Umgang mit Computern von Dickhäuser (2001).

ESM Tabelle 1.2. TEiSel-Items zum technikbezogenen Kompetenzerleben.

| Item                                                 | Wortlaut                                                                                        | $\alpha$   | $\omega_t$ | $M$         | $SD$        | $r_{it}$ |
|------------------------------------------------------|-------------------------------------------------------------------------------------------------|------------|------------|-------------|-------------|----------|
| <b><i>Kompetenzerleben im Umgang mit Technik</i></b> |                                                                                                 | <b>.85</b> | <b>.87</b> | <b>3.22</b> | <b>0.78</b> |          |
| KE01                                                 | Ich kann ziemlich viele der technischen Probleme, mit denen ich konfrontiert bin, allein lösen. |            |            | 3.14        | 1.02        | .70      |
| KE02                                                 | Es fällt mir leicht, die Bedienung eines technischen Gerätes zu lernen.                         |            |            | 3.84        | 0.82        | .62      |
| KE03                                                 | Im Umgang mit Alltagstechnik bin ich kompetenter als der Durchschnitt meiner Altersklasse.      |            |            | 2.91        | 0.96        | .63      |
| KE04*                                                | Beim Bearbeiten von technischen Problemen brauche ich Hilfe.                                    |            |            | 3.26        | 1.10        | .65      |
| KE05                                                 | Im Lösen technischer Probleme war ich schon immer gut.                                          |            |            | 2.96        | 1.04        | .72      |

Anmerkungen: Antwortskala 1– trifft nicht zu bis 5– trifft zu. \* = Item ist invertiert.

## Elektronisches Supplement 1. Skalen und Items des TEiSel

*Technikbezogene Selbstwirksamkeitserwartungen* (TSWE) beschreiben das Vertrauen einer Person aufgrund ihrer eigenen Fähigkeiten zukünftige Situationen im Umgang mit Technik erfolgreich bewältigen zu können (vgl. Definition SWE nach Bandura, 1977). Zur Erfassung von TSWE gibt es eine Vielzahl von Skalen, die sich zumeist auf TSWE in Situationen mit Computern beziehen. Murphy, Coover und Owen (1989) entwickelten eine 32 Items umfassende Selbsteinschätzungsskala, die das Vertrauen einer Person in die Bewältigung computerspezifischer Aufgabenstellungen erfasst. TSWE sind darüber hinaus eng mit dem Gefühl der Kontrolle von technischen Systemen (Beier, 2004) bzw. der Einschätzung der Einfachheit der Nutzung technischer Systeme verbunden (Davis, 1989).

**ESM Tabelle 1.3.** TEiSel-Items zur technikbezogenen Selbstwirksamkeitserwartung.

| Item                                                            | Wortlaut                                                                                                                                             | $\alpha$   | $\omega_t$ | $M$         | $SD$        | $r_{it}$ |
|-----------------------------------------------------------------|------------------------------------------------------------------------------------------------------------------------------------------------------|------------|------------|-------------|-------------|----------|
| <b><i>Selbstwirksamkeitserwartung im Umgang mit Technik</i></b> |                                                                                                                                                      | <b>.83</b> | <b>.85</b> | <b>3.50</b> | <b>0.75</b> |          |
| SE01                                                            | Weil ich mit bisherigen technischen Problemen gut zurechtgekommen bin, blicke ich auch künftigen optimistisch entgegen.                              |            |            | 3.57        | 0.94        | .71      |
| SE02                                                            | Wenn ich mich bemühe, gelingt mir in der Regel die Lösung technischer Probleme.                                                                      |            |            | 3.88        | 0.79        | .53      |
| SE03                                                            | Schwierigkeiten im Umgang mit technischen Geräten sehe ich gelassen entgegen, weil ich mich immer auf meine technischen Fertigkeiten verlassen kann. |            |            | 3.13        | 0.98        | .73      |
| SE04                                                            | Ich fühle mich den meisten technikbezogenen Anforderungen gewachsen.                                                                                 |            |            | 3.44        | 0.97        | .68      |

*Anmerkungen:* Antwortskala 1– trifft nicht zu bis 5– trifft zu.

### 3. Selbstwahrnehmungen affektiver Komponenten

*Positive Affekte gegenüber Technik* beschreiben Gefühle von Freude und Interesse in der Auseinandersetzung mit Technik. In der bisherigen Literatur finden sich scheinbar verschiedene Skalen, die auf Itemebene allerdings häufig Neugier bezüglich Technik thematisieren. Beispiele sind die Subskala Begeisterung für Technik von Karrer et al.(2009; „Ich liebe es, neue elektronische Geräte zu besitzen“) und die Subskala Technikakzeptanz von Neyer et al.(2012; “Ich bin stets daran interessiert, die neusten technischen Geräte zu verwenden”).

## Elektronisches Supplement 1. Skalen und Items des TEiSel

ESM Tabelle 1.4. TEiSel-Items zum positiven Affekt gegenüber Technik.

| Item                                             | Wortlaut                                                                                                               | $\alpha$   | $\omega_t$ | $M$         | $SD$        | $r_{it}$ |
|--------------------------------------------------|------------------------------------------------------------------------------------------------------------------------|------------|------------|-------------|-------------|----------|
| <b><i>Positiver Affekt gegenüber Technik</i></b> |                                                                                                                        | <b>.83</b> | <b>.89</b> | <b>3.17</b> | <b>0.85</b> |          |
| PA01                                             | Es macht mir richtig Spaß, ein Problem mit einem technischen Gerät zu lösen.                                           |            |            | 2.90        | 1.19        | .62      |
| PA02                                             | Ich informiere mich über technische Geräte, auch wenn ich keine Kaufabsicht habe.                                      |            |            | 2.60        | 1.32        | .55      |
| PA03*                                            | Technik muss funktionieren, technische Details interessieren mich dabei nicht.                                         |            |            | 2.84        | 1.20        | .53      |
| PA04                                             | Ich liebe es, neue technische Geräte zu besitzen.                                                                      |            |            | 3.65        | 1.10        | .56      |
| PA05                                             | Es macht mir Spaß, ein technisches Gerät auszuprobieren.                                                               |            |            | 3.90        | 1.01        | .70      |
| PA06                                             | Wenn ich Gelegenheit dazu hätte, würde ich noch viel häufiger technische Produkte nutzen, als ich das gegenwärtig tue. |            |            | 3.16        | 1.19        | .60      |

*Anmerkungen:* Antwortskala 1– trifft nicht zu bis 5– trifft zu. \* = Item ist invertiert.

*Negative Affekte gegenüber Technik* fassen Gefühle von Ängstlichkeit, Überforderung und Abneigung zusammen. Für die Erfassung der Ängstlichkeit gegenüber Technik gibt es ebenfalls überwiegend Skalen, die sich auf den Umgang mit Computern beziehen. In dem von Marcoulides (1989) entwickelten Testinstrument zur Erfassung der Computerängstlichkeit sollen Personen beispielsweise ihre Ängstlichkeit in Bezug auf 20 Situationen am Computer einschätzen.

## Elektronisches Supplement 1. Skalen und Items des TEiSel

ESM Tabelle 1.5. TEiSel-Items zum negativen Affekt gegenüber Technik.

| Item                                      | Wortlaut                                                                                        | $\alpha$   | $\omega_t$ | $M$         | $SD$        | $r_{it}$ |
|-------------------------------------------|-------------------------------------------------------------------------------------------------|------------|------------|-------------|-------------|----------|
| <i>Negativer Affekt gegenüber Technik</i> |                                                                                                 | <i>.77</i> | <i>.82</i> | <i>2.86</i> | <i>0.81</i> |          |
| NA01                                      | Ich habe öfter das Gefühl, dass technische Geräte machen, was sie wollen.                       |            |            | 2.80        | 1.13        | .39      |
| NA02                                      | Ich hasse Probleme mit technischen Geräten.                                                     |            |            | 3.88        | 1.08        | .44      |
| NA03                                      | Im Umgang mit technischen Geräten habe ich Angst etwas falsch zu machen.                        |            |            | 2.64        | 1.18        | .71      |
| NA04                                      | Ich bin im Umgang mit unbekanntem technischen Geräten erst einmal überfordert.                  |            |            | 2.67        | 1.08        | .60      |
| NA05                                      | Ich habe Angst, neue technische Geräte eher kaputt zu machen, als dass ich sie richtig benutze. |            |            | 2.32        | 1.14        | .60      |

Anmerkungen: Antwortskala 1– trifft nicht zu bis 5– trifft zu.

### 4. Verfahren zur Erfassung technikbezogener Einstellungen und Selbstwahrnehmungen

Die Entwicklung des TEiSel ist relevant, da bisherige Instrumente oft nur einzelne Konstrukte fokussieren (z. B. Kontrollüberzeugungen im Umgang mit Technik: Beier, 2004; Technikängstlichkeit: Marcoulides, 1989) oder sich auf spezifische technische Artefakte beziehen (Computer: z. B. Richter, Naumann & Horz, 2010). Eine Ausnahme bildet das Instrument von Janneck, Vincent-Höper und Othersen (2012), das zwölf verschiedene Teilfacetten differenziert. Es erhebt den Anspruch, das technikbezogene Selbstkonzept zu erfassen, das sich im TEiSel konzeptuell in der Facette des technikbezogenen Kompetenzerlebens widerspiegelt. Allerdings ordnen Janneck et al. (2012) (siehe auch Vincent & Janneck, 2012) dem technikbezogenen Selbstkonzept auch Interessen, Handlungserfahrungen und Einstellungen (sowie andere in dem Instrument erfasste Konstrukte) zu, die in der Forschungsliteratur häufig nicht dem Selbstkonzept zugeordnet werden (z. B. Bong & Skaalvik, 2003). Das Instrument wirft zudem Fragen auf, da die dort berichtete Interkorrelation zwischen dem Kompetenzerleben und Selbstwirksamkeitserwartungen mit  $r = -.34$  negativ ist.

Alle der für die Konstruktion der Skala TEiSel berücksichtigten Skalen sind in der ESM Tabelle 1.6. aufgeführt.

## Elektronisches Supplement 1. Skalen und Items des TEiSel

ESM Tabelle 1.6. Übersicht über Verfahren im Bereich technikbezogener Einstellungen und Selbstwahrnehmungen.

| Bereich                       | Facette               | Technikbezug      | Quelle                                        |
|-------------------------------|-----------------------|-------------------|-----------------------------------------------|
| Einstellungen                 | Einstellungen         | Technik allgemein | Ardies, Maeyer, Gijbels und van Keulen (2015) |
|                               | Einstellungen         | Computer          | Karrer et al. (2009)                          |
|                               | Einstellungen         | Technik allgemein | Richter et al. (2010)                         |
|                               | Nützlichkeit          | Computer          | Davis (1989)                                  |
|                               | Technikbild           | Technik allgemein | Janneck et al. (2012)                         |
| Kognitive Selbstwahrnehmungen | Attributionen         | Computer          | Dickhäuser (2001)                             |
|                               | Attributionen         | Technik allgemein | Janneck et al. (2012)                         |
|                               | Kompetenzeinschätzung | Computer          | Dickhäuser (2001)                             |
|                               | Kompetenzeinschätzung | Technik allgemein | Janneck et al. (2012)                         |
|                               | Kompetenzeinschätzung | Technik allgemein | Karrer et al. (2009)                          |
|                               | Kompetenzeinschätzung | Technik allgemein | Neyer et al. (2012)                           |
|                               | Kontrollüberzeugungen | Technik allgemein | Beier (1999)                                  |
|                               | Kontrollüberzeugungen | Technik allgemein | Neyer et al. (2012)                           |
|                               | Selbstwirksamkeit     | Computer          | Davis (1989)                                  |
|                               | Selbstwirksamkeit     | Computer          | Dickhäuser (2001)                             |
|                               | Selbstwirksamkeit     | Technik allgemein | Janneck et al. (2012)                         |
|                               | Selbstwirksamkeit     | Computer          | Murphy et al. (1989)                          |

## Elektronisches Supplement 1. Skalen und Items des TEiSel

Fortsetzung ESM Tabelle 1.6. Übersicht über Verfahren im Bereich technikbezogener Einstellungen und Selbstwahrnehmungen.

| Bereich                       | Facette       | Technikbezug      | Quelle                    |
|-------------------------------|---------------|-------------------|---------------------------|
| Affektive Selbstwahrnehmungen | Affekt        | Technik allgemein | Janneck et al. (2012)     |
|                               | Ängstlichkeit | Technik allgemein | Janneck et al. (2012)     |
|                               | Ängstlichkeit | Computer          | Marcoulides (1989)        |
|                               | Ängstlichkeit | Computer          | Richter et al. (2010)     |
|                               | Begeisterung  | Technik allgemein | Karrer et al. (2009)      |
|                               | Neugier       | Computer          | Agarwal und Prasad (1998) |
|                               | Neugier       | Technik allgemein | Neyer et al. (2012)       |
| Sonstige                      | Anwenden      | Technik allgemein | Janneck et al. (2012)     |
|                               | Erfahrungen   | Technik allgemein | Janneck et al. (2012)     |
|                               | Erfahrungen   | Computer          | Niels und Janneck (2017)  |
|                               | Gestalten     | Technik allgemein | Janneck et al. (2012)     |
|                               | Strategien    | Technik allgemein | Janneck et al. (2012)     |
|                               | Verstehen     | Technik allgemein | Janneck et al. (2012)     |

## Elektronisches Supplement 1. Skalen und Items des TEiSel

### Referenzen

- Agarwal, R. & Prasad, J. (1998). A Conceptual and Operational Definition of Personal Innovativeness in the Domain of Information Technology. *Information Systems Research*, 9(2), 204–215. <https://doi.org/10.1287/isre.9.2.204>
- Ardies, J., Maeyer, S. de, Gijbels, D. & van Keulen, H. (2015). Students attitudes towards technology. *International Journal of Technology and Design Education*, 25(1), 43–65. <https://doi.org/10.1007/s10798-014-9268-x>
- Arning, K. & Ziefle, M. (2007). Barriers of Information Access in Small Screen Device Applications: The Relevance of User Characteristics for a Transgenerational Design. In C. Stephanidis & M. Pieper (Eds.), *Universal access in ambient intelligence environments* (Lecture Notes in Computer Science, vol. 4397, S. 117–136). 9th ERCIM Workshop on User Interfaces for All, Königswinter, Germany, September 27 - 28, 2006; revised papers. Berlin: Springer. [https://doi.org/10.1007/978-3-540-71025-7\\_9](https://doi.org/10.1007/978-3-540-71025-7_9)
- Bandura, A. (1977). Self-efficacy: Toward a Unifying Theory of Behavioral Change. *Psychological Review*, 84(2), 191–215. <https://doi.org/10.1037/0033-295X.84.2.191>
- Beier, G. (1999). Kontrollüberzeugungen im Umgang mit Technik. *Report Psychologie*, 9, 684–693.
- Beier, G. (2004). *Kontrollüberzeugungen im Umgang mit Technik: ein Persönlichkeitsmerkmal mit Relevanz für die Gestaltung technischer Systeme*. Dissertation. Humboldt-Universität zu Berlin, Berlin. Verfügbar unter: <https://d-nb.info/970224710/04>
- Bong, M. & Skaalvik, E. M. (2003). Academic Self-Concept and Self-Efficacy: How Different Are They Really? *Educational Psychology Review*, 15(1), 1–40. <https://doi.org/10.1023/A:1021302408382>
- Czaja, S. J., Charness, N., Fisk, A. D., Hertzog, C., Nair, S. N., Rogers, W. A. et al. (2006). Factors Predicting the Use of Technology: Findings from the Center for Research and Education on Aging and Technology Enhancement (CREATE). *Psychology and aging*, 21(2), 333–352.
- Davis, F. D. (1989). Perceived Usefulness, Perceived Ease of Use, and User Acceptance of Information Technology. *MIS Quarterly*, 13(3), 319–340. <https://doi.org/10.2307/249008>
- Davis, F. D., Bagozzi, R. P. & Warshaw, P. R. (1989). User Acceptance of Computer Technology: A Comparison of two Theoretical Models. *Management Science*, 35(8), 982–1003. <https://doi.org/10.1287/mnsc.35.8.982>

## Elektronisches Supplement 1. Skalen und Items des TEiSel

- Dickhäuser, O. (2001). *Computernutzung und Geschlecht. Ein Erwartung-Wert-Modell* (Pädagogische Psychologie und Entwicklungspsychologie, Bd. 26). Münster: Waxmann.
- Janneck, M., Vincent-Höper, S. & Othersen, I. (2012). Entwicklung und Validierung eines Fragebogens zum Technikbezogenen Selbstkonzept (TSK): Eine gendersensitive Studie. *Gruppendynamik und Organisationsberatung*, 43(3), 289–310.  
<https://doi.org/10.1007/s11612-012-0184-9>
- Karrer, K., Glaser, C., Clemens, C. & Bruder, C. (2009). Technikaffinität erfassen - der Fragebogen TA-EG. In Zentrum Mensch-Maschine-Systeme (Hrsg.), *Tagungsband 8. Berliner Werkstatt Mensch-Maschine-Systeme* (S. 194–199). Verfügbar unter:  
<http://www.zmms.tu-berlin.de/fileadmin/f25/dokumente/8BWMMS/13.3-Karrer.pdf>
- Kelley, C. L., Morell, R. W., Park, D. C. & Mayhorn, C. B. (1999). Predictors of electronic bulletin board system use in older adults. *Educational Gerontology*, 25(1), 19–35.  
<https://doi.org/10.1080/036012799267990>
- Marcoulides, G. A. (1989). Measuring Computer Anxiety: The Computer Anxiety Scale. *Educational and Psychological Measurement*, 49(3), 733–739.  
<https://doi.org/10.1177/001316448904900328>
- Murphy, C. A., Coover, D. & Owen, S. V. (1989). Development and validation of the computer self-efficacy scale. *Educational and Psychological Measurement*, 49(4), 893–899. <https://doi.org/10.1177/001316448904900412>
- Neyer, F. J., Felber, J. & Gebhardt, C. (2012). Entwicklung und Validierung einer Kurzskala zur Erfassung von Technikbereitschaft. *Diagnostica*, 58(2), 87–99.  
<https://doi.org/10.1026/0012-1924/a000067>
- Niels, A. & Janneck, M. (2017). Understanding the Relations Between Self-concept and Causal Attributions Regarding Computer Use. In D. Harris (Hrsg.), *Engineering Psychology and Cognitive Ergonomics: Performance, Emotion and Situation Awareness* (Lecture Notes in Computer Science, Bd. 10275, S. 180–199). Cham: Springer International Publishing. [https://doi.org/10.1007/978-3-319-58472-0\\_15](https://doi.org/10.1007/978-3-319-58472-0_15)
- Richter, T., Naumann, J. & Horz, H. (2010). Eine revidierte Fassung des Inventars zur Computerbildung (INCOBI-R). *Zeitschrift für Pädagogische Psychologie*, 24, 23–37.  
<https://doi.org/10.1024/1010-0652/a000002>
- Schmidt, L. (2017). *Technikhandhabung im höheren Alter: Zur Rolle von kognitiver Leistungsfähigkeit, Technikeinstellung und Technikerfahrung*. Wiesbaden: Springer.  
<https://doi.org/10.1007/978-3-658-16161-3>

## Elektronisches Supplement 1. Skalen und Items des TEiSel

Venkatesh, V., Morris, M. G., Davis, G. B. & Davis, F. D. (2003). User Acceptance of Information Technology: Toward a Unified View. *MIS Quarterly*, 27(3), 425–478.  
<https://doi.org/10.2307/30036540>

Vincent, S. & Janneck, M. (2012). Das Technikbezogene Selbstkonzept von Frauen und Männern in technischen Berufsfeldern: Modell und empirische Anwendung. *Psychologie des Alltagshandelns*, 5(1), 53–67. <https://doi.org/10.15203/1998-9970-5-1-05>

Wagner, N., Hassanein, K. & Head, M. (2010). Computer use by older adults: A multi-disciplinary review. *Computers in Human Behavior*, 26(5), 870–882.  
<https://doi.org/10.1016/j.chb.2010.03.029>
