# Supplementary material for: Entwicklung eines Fragebogens zur ökonomischen Erfassung technikbezogener Einstellungen und Selbstwahrnehmungen
Source: Atypon-hosted journal article supplement (doi:10.1026/0012-1924/a000323), 2023-09-18
Supplement: 0012-1924_a000323_esm3.pdf [file 0012-1924_a000323_esm3.pdf]

### Elektronisches Supplement 3. Psychometrische Analysen

Das elektronische Supplement 3 beschreibt die detaillierte Durchführung der konfirmatorischen Faktoranalysen (CFAs) sowie die Indikator- und Faktorreliabilitäten und die durchschnittlich erfasste Varianz (AVE) der Faktoren der fünffaktoriellen Lösung.

**Vorgehen.** Zur Überprüfung der angenommenen internen Skalenstruktur wurden CFA-Modelle mit dem R-Paket *lavaan* (Rosseel, 2012) durchgeführt. Das angenommene Fünf-Faktoren-Modell wurde mit einem Ein-Faktor-Modell, einem Zwei-Faktoren-Modell (Einstellungen vs. Selbstwahrnehmungen) sowie einem Drei-Faktoren-Modell (Einstellungen vs. kognitive Selbstwahrnehmungen vs. affektive Selbstwahrnehmungen) verglichen. Die Faktorladungen wurden in allen Modellen frei geschätzt. Als Schätzer wurden Maximum Likelihood-Schätzungen verwendet; zur Schätzung der Standardfehler wurde Bootstrapping eingesetzt ( $B = 1\ 000$  Samples). Zur Bewertung der Modellgüte und zum Modellvergleich wurden der RMSEA, SRMR, CFI, AIC und BIC betrachtet (vgl. Schermelleh-Engel, Moosbrugger & Müller, 2003).

Aufgrund einer auffällig hohen latenten Korrelation zwischen dem technikbezogenen Kompetenzerleben und den technikbezogenen Selbstwirksamkeitserwartungen (TSWE) im Fünf-Faktoren-Modell ( $r = .95$ ) wurden explorativ zwei weitere alternative Modelle getestet. Einerseits wurde ein Vier-Faktoren-Modell spezifiziert, in dem die Items zum technikbezogenen Kompetenzerleben und TSWE auf einem gemeinsamen Faktor laden; andererseits wurde in einem alternativen Fünf-Faktoren-Modell die latente Korrelation zwischen den betreffenden Faktoren auf 1 fixiert.

Für das Fünf-Faktoren-Modell wurden zur Bestimmung der Indikatorreliabilität die Ladungen der Items auf ihren jeweiligen Faktor quadriert. Werte von unter .40 gelten als kritisch, da in diesem Fall weniger als 40 % der Itemvarianz durch das jeweilige Konstrukt vorhergesagt werden kann. Die Faktorreliabilität hingegen gibt den Anteil gemeinsamer systematischer Varianz eines Indikatorensets zur Schätzung eines latenten Konstrukts an und sollte größer als ein Wert von .60 sein. Zusätzlich haben wir die quadrierten latenten Korrelationen der TEiSel-Facetten bestimmt und sie mit der durchschnittlich erfassten Varianz (*average variance extracted*, AVE) der jeweiligen Faktoren verglichen. Wenn die AVEs höher als die quadrierten Korrelationen sind, kann davon ausgegangen werden, dass die Konstrukte hinreichend gut voneinander abgegrenzt werden können (Fornell & Larcker, 1981).

### Elektronisches Supplement 3. Psychometrische Analysen

Die Item- und Skalenkennwerte sowie Reliabilitätsschätzer wurden mit *psych* (Revelle, 2018) ermittelt.

**Ergebnisse.** Die Ergebnisse der konfirmatorischen Faktoranalysen sind in Tabelle 1 im Manuskript dargestellt. Die Indikator- und Faktorreliabilitäten, AVEs und quadrierten latenten Korrelationen des Fünf-Faktorenmodells sind in der ESM Tabelle 3.1 zusammengefasst. Obwohl alle Faktorreliabilitäten über dem Kriterium von .60 lagen, fielen die Indikatorreliabilitäten zum Teil geringer als .40 aus, was insbesondere vier der fünf Items des Faktors „Einstellung gegenüber Technik“ betraf. Des Weiteren war entsprechend des Fornell-Larcker-Kriteriums lediglich die Einstellungsfacette von den anderen Faktoren hinreichend abgrenzbar (d. h. die AVE von .29 war größer als alle quadrierten Korrelationen). Mit Ausnahme der Beziehung von „Positiver Affekt“ (AVE = .45) und „Negativer Affekt“ (AVE = .43; quadrierte Korrelationen von .30) war das Fornell-Larcker-Kriterium mit Blick auf die restlichen Konstruktbeziehungen der Selbstwahrnehmungsfacetten verletzt.

**ESM Tabelle 3.1.** Indikator- und Faktorreliabilitäten, durchschnittlich erfasste Varianzen (AVEs) und quadrierte latente Korrelationen für das 5-Faktorenmodell

| Faktor                  | Indikatorreliabilität | Faktorreliabilität | AVE | $\hat{\rho}^2$ |
|-------------------------|-----------------------|--------------------|-----|----------------|
| (1) Einstellung Technik | .19–.53               | .66                | .29 | .10–.17        |
| (2) Techn. Kompetenz    | .44–.66               | .85                | .53 | .12–.91        |
| (3) Techn. SWE          | .35–.69               | .84                | .56 | .13–.91        |
| (4) Positiver Affekt    | .32–.66               | .83                | .45 | .17–.58        |
| (5) Negativer Affekt    | .21–.62               | .78                | .43 | .10–.63        |

## Elektronisches Supplement 3. Psychometrische Analysen

### Referenzen

- Fornell, C. & Larcker, D. F. (1981). Evaluating Structural Equation Models with Unobservable Variables and Measurement Error. *Journal of Marketing Research*, 18(1), 39. <https://doi.org/10.2307/3151312>
- Revelle, W. (2018). *psych: Procedures for Psychological, Psychometric, and Personality Research*. Evanston, Illinois: Northwestern University. Verfügbar unter: <https://CRAN.R-project.org/package=psych>
- Rosseel, Y. (2012). lavaan: An R Package for Structural Equation Modeling. *Journal of Statistical Software*, 48(2), 1–36. <https://doi.org/10.18637/jss.v048.i02>
- Schermelleh-Engel, K., Moosbrugger, H. & Müller, H. (2003). Evaluating the Fit of Structural Equation Models: Tests of Significance and Descriptive Goodness-of-Fit Measures. *Methods of Psychological Research*, 8(2), 23–74.
