# Supplementary material for: Entwicklung eines Fragebogens zur ökonomischen Erfassung technikbezogener Einstellungen und Selbstwahrnehmungen
Source: Atypon-hosted journal article supplement (doi:10.1026/0012-1924/a000323), 2023-09-18
Supplement: 0012-1924_a000323_esm4.pdf [file 0012-1924_a000323_esm4.pdf]

## Elektronisches Supplement 4. Untersuchungsergebnisse nach 4-Faktoren-Lösung

### ESM Abbildung 4.1. Vierfaktorielle Struktur der Skala TEiSel

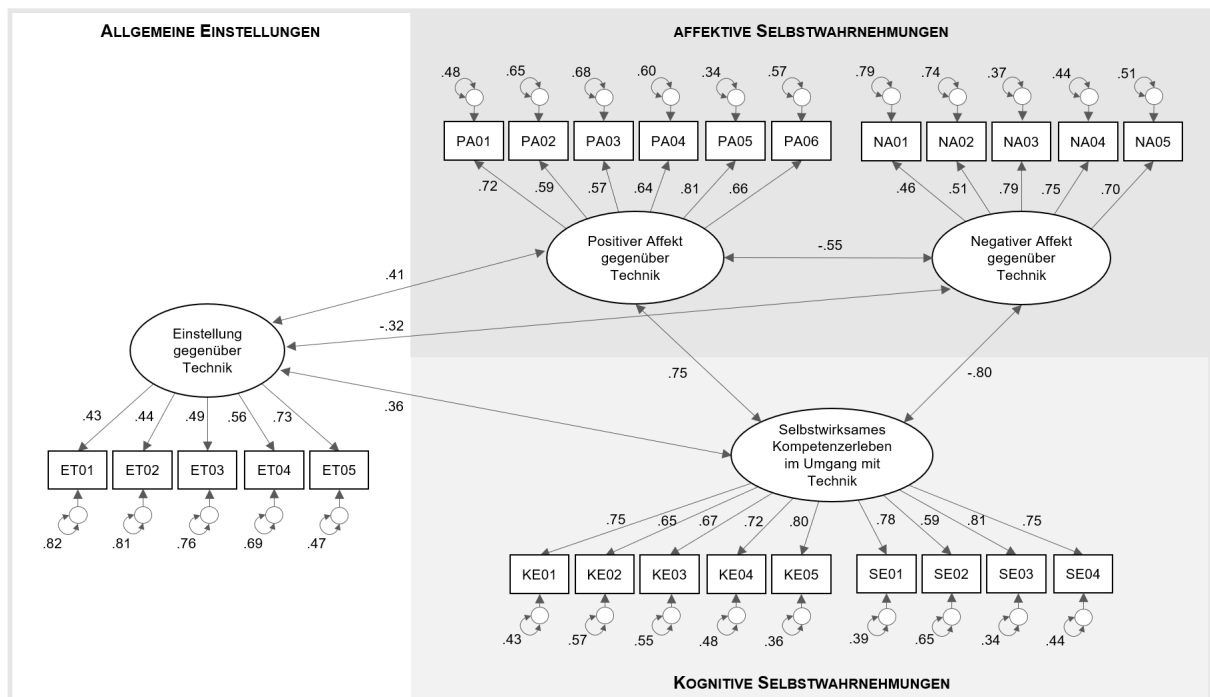

*Anmerkungen:* Vierfaktorielle Struktur (dargestellt sind die standardisierten latenten Korrelationen, Faktorladungen und Residualvarianzen). Alle Parameterschätzungen sind signifikant,  $p < .001$ ). Itembezeichnungen: ET = Einstellungen gegenüber Technik; KE = Kompetenzerleben; SE = Selbstwirksamkeitserwartung; PA = Positiver Affekt gegenüber Technik; NA = Negativer Affekt gegenüber Technik; die Ziffern 01-06 bezeichnen die Itemnummern. Die genauen Itemwortlaute sind in ESM 1 berichtet.

## Elektronisches Supplement 4. Untersuchungsergebnisse nach 4-Faktoren-Lösung

**ESM Tabelle 4.1.** Korrelationen der manifesten Personenvariablen (*p*-Werte in Klammern darunter). Der graue Bereich hebt die Korrelationen der Variablen mit dem selbstwirksamen Kompetenzerleben hervor.

|                                      | (1)                                | (2)                                | (3)                                | (4)                                | (5)                                | (6)            | (7)                               | (8)                  | (9)                               | (10)                              |
|--------------------------------------|------------------------------------|------------------------------------|------------------------------------|------------------------------------|------------------------------------|----------------|-----------------------------------|----------------------|-----------------------------------|-----------------------------------|
| (1) Selbstwirksames Kompetenzerleben | -                                  |                                    |                                    |                                    |                                    |                |                                   |                      |                                   |                                   |
| (2) Einstellung gegenüber Technik    | <b>.43</b><br>( <b>&lt;.001</b> )  | -                                  |                                    |                                    |                                    |                |                                   |                      |                                   |                                   |
| (3) Positiver Affekt                 | <b>.82</b><br>( <b>&lt;.001</b> )  | <b>.50</b><br>( <b>&lt;.001</b> )  | -                                  |                                    |                                    |                |                                   |                      |                                   |                                   |
| (4) Negativer Affekt                 | <b>-.87</b><br>( <b>&lt;.001</b> ) | <b>-.40</b><br>( <b>&lt;.001</b> ) | <b>-.64</b><br>( <b>&lt;.001</b> ) | -                                  |                                    |                |                                   |                      |                                   |                                   |
| (5) Allg. SWE                        | <b>.31</b><br>( <b>&lt;.001</b> )  | <b>.21</b><br>( <b>&lt;.001</b> )  | <b>.18</b><br>(.002)               | <b>-.34</b><br>( <b>&lt;.001</b> ) | -                                  |                |                                   |                      |                                   |                                   |
| (6) Ext. Kontrollüberzeugungen       | -.10<br>(.099)                     | -.07<br>(.209)                     | .07<br>(.239)                      | <b>.21</b><br>( <b>&lt;.001</b> )  | <b>-.41</b><br>( <b>&lt;.001</b> ) | -              |                                   |                      |                                   |                                   |
| (7) Intelligenz                      | <b>.29</b><br>( <b>&lt;.001</b> )  | <b>.17</b><br>(.003)               | <b>.12</b><br>(.004)               | <b>-.22</b><br>( <b>&lt;.001</b> ) | .05<br>(.365)                      | .04<br>(.461)  | -                                 |                      |                                   |                                   |
| (8) Geschlecht                       | <b>.31</b><br>( <b>&lt;.001</b> )  | <b>.11</b><br>(.036)               | <b>.32</b><br>( <b>&lt;.001</b> )  | <b>-.29</b><br>( <b>&lt;.001</b> ) | <b>.22</b><br>( <b>&lt;.001</b> )  | -.06<br>(.280) | <b>.11</b><br>(.050)              | -                    |                                   |                                   |
| (9) TPL Explorationsintensität       | .06<br>(.318)                      | <b>.12</b><br>(.043)               | .07<br>(.256)                      | -.05<br>(.367)                     | -.04<br>(.482)                     | -.03<br>(.596) | <b>.31</b><br>( <b>&lt;.001</b> ) | .08<br>(.178)        | -                                 |                                   |
| (10) TPL Explorationsvollständigkeit | <b>.12</b><br>(.043)               | <b>.15</b><br>(.009)               | .10<br>(.099)                      | <b>-.14</b><br>(.019)              | -.01<br>(.860)                     | -.03<br>(.594) | <b>.45</b><br>( <b>&lt;.001</b> ) | <b>.12</b><br>(.048) | <b>.78</b><br>( <b>&lt;.001</b> ) | -                                 |
| (11) TPL Steuerungsleistung          | <b>.23</b><br>( <b>&lt;.001</b> )  | <b>.18</b><br>(.002)               | <b>.17</b><br>(.003)               | <b>-.21</b><br>( <b>&lt;.001</b> ) | .04<br>(.476)                      | -.02<br>(.800) | <b>.49</b><br>( <b>&lt;.001</b> ) | <b>.12</b><br>(.033) | <b>.43</b><br>( <b>&lt;.001</b> ) | <b>.59</b><br>( <b>&lt;.001</b> ) |

*Anmerkungen:* Statistisch signifikante Ergebnisse sind fett gedruckt. SWE = Selbstwirksamkeitserwartungen. TPL = technisches Problemlösen.

## Elektronisches Supplement 4. Untersuchungsergebnisse nach 4-Faktoren-Lösung

ESM Tabelle 4.2. Ergebnisse der Regressionsanalysen.

|                             | Explorationsintensität |                 |                   |                 | Explorationsvollständigkeit |                 |                    |                 | Steuerungsleistung |                 |                     |                 |
|-----------------------------|------------------------|-----------------|-------------------|-----------------|-----------------------------|-----------------|--------------------|-----------------|--------------------|-----------------|---------------------|-----------------|
|                             | Baseline-Modell        |                 | Gesamtmodell      |                 | Baseline-Modell             |                 | Gesamtmodell       |                 | Baseline-Modell    |                 | Gesamtmodell        |                 |
|                             | $\beta$                | $p$             | $\beta$           | $p$             | $\beta$                     | $p$             | $\beta$            | $p$             | $\beta$            | $p$             | $\beta$             | $p$             |
| Allgemeine SWE              | -.11                   | .091            | -.11              | .092            | -.08                        | .154            | -.10               | .108            | .02                | .667            | -.01                | .808            |
| Kontrollüberzeugungen       | -.08                   | .170            | -.09              | .150            | -.08                        | .166            | -.07               | .247            | .00                | .976            | .00                 | .985            |
| Intelligenz                 | <b>.32</b>             | <b>&lt;.001</b> | <b>.31</b>        | <b>&lt;.001</b> | <b>.45</b>                  | <b>&lt;.001</b> | <b>.43</b>         | <b>&lt;.001</b> | <b>.28</b>         | <b>&lt;.001</b> | <b>.25</b>          | <b>&lt;.001</b> |
| Geschlecht                  | .06                    | .289            | .06               | .290            | .08                         | .150            | .08                | .174            | .03                | .469            | .02                 | .747            |
| Explorationsintensität      |                        |                 |                   |                 |                             |                 |                    |                 | -.05               | .484            | -.05                | .510            |
| Explorationsvollständigkeit |                        |                 |                   |                 |                             |                 |                    |                 | <b>.50</b>         | <b>&lt;.001</b> | <b>.50</b>          | <b>&lt;.001</b> |
| Selbstw. Kompetenzerleben   |                        |                 | -.01              | .925            |                             |                 | -.05               | .732            |                    |                 | .24                 | .057            |
| Einstellung Technik         |                        |                 | .09               | .169            |                             |                 | .09                | .139            |                    |                 | .03                 | .548            |
| Positiver Affekt            |                        |                 | .02               | .862            |                             |                 | -.02               | .843            |                    |                 | -.08                | .347            |
| Negativer Affekt            |                        |                 | .05               | .667            |                             |                 | -.06               | .604            |                    |                 | .08                 | .428            |
| $F(df_1, df_2)$             | $F(4, 291) = 9.0$      |                 | $F(8, 287) = 4.8$ |                 | $F(4, 291) = 19.5$          |                 | $F(8, 287) = 10.1$ |                 | $F(6, 289) = 34.1$ |                 | $F(10, 285) = 21.4$ |                 |
| $R^2$                       | .11                    |                 | .12               |                 | .21                         |                 | .22                |                 | .41                |                 | .43                 |                 |

Anmerkungen: Statistisch signifikante Ergebnisse sind fett gedruckt. SWE = Selbstwirksamkeitserwartungen.
