# Supplementary material for: Entwicklung eines Fragebogens zur ökonomischen Erfassung technikbezogener Einstellungen und Selbstwahrnehmungen
Source: Atypon-hosted journal article supplement (doi:10.1026/0012-1924/a000323), 2023-09-18
Supplement: 0012-1924_a000323_esm5.pdf [file 0012-1924_a000323_esm5.pdf]

## Elektronisches Supplement 5. Korrelationen und ergänzende Regressionsanalysen

ESM Tabelle 5.1. Korrelationen der manifesten Personenvariablen (*p*-Werte in Klammern darunter).

|                                      | (1)                                | (2)                                | (3)                                | (4)                                | (5)                                | (6)                                | (7)            | (8)                               | (9)                  | (10)                              | (11)                              |
|--------------------------------------|------------------------------------|------------------------------------|------------------------------------|------------------------------------|------------------------------------|------------------------------------|----------------|-----------------------------------|----------------------|-----------------------------------|-----------------------------------|
| (1) Einstellung gegenüber Technik    | -                                  |                                    |                                    |                                    |                                    |                                    |                |                                   |                      |                                   |                                   |
| (2) Techn. Kompetenzerleben          | <b>.43</b><br>( <i>&lt;.001</i> )  | -                                  |                                    |                                    |                                    |                                    |                |                                   |                      |                                   |                                   |
| (3) Techn. SWE                       | <b>.43</b><br>( <i>&lt;.001</i> )  | <b>.99</b><br>( <i>&lt;.001</i> )  | -                                  |                                    |                                    |                                    |                |                                   |                      |                                   |                                   |
| (4) Positiver Affekt                 | <b>.50</b><br>( <i>&lt;.001</i> )  | <b>.83</b><br>( <i>&lt;.001</i> )  | <b>.79</b><br>( <i>&lt;.001</i> )  | -                                  |                                    |                                    |                |                                   |                      |                                   |                                   |
| (5) Negativer Affekt                 | <b>-.40</b><br>( <i>&lt;.001</i> ) | <b>-.85</b><br>( <i>&lt;.001</i> ) | <b>-.87</b><br>( <i>&lt;.001</i> ) | <b>-.64</b><br>( <i>&lt;.001</i> ) | -                                  |                                    |                |                                   |                      |                                   |                                   |
| (6) Allg. SWE                        | <b>.21</b><br>( <i>&lt;.001</i> )  | <b>.30</b><br>( <i>&lt;.001</i> )  | <b>.32</b><br>( <i>&lt;.001</i> )  | <b>.18</b><br>(.003)               | <b>-.34</b><br>( <i>&lt;.001</i> ) | -                                  |                |                                   |                      |                                   |                                   |
| (7) Ext. Kontrollüberzeugungen       | -.07<br>(.201)                     | -.08<br>(.194)                     | <b>-.12</b><br>(.043)              | .07<br>(.219)                      | <b>.21</b><br>( <i>&lt;.001</i> )  | <b>-.41</b><br>( <i>&lt;.001</i> ) | -              |                                   |                      |                                   |                                   |
| (8) Intelligenz                      | <b>.17</b><br>(.003)               | <b>.21</b><br>( <i>&lt;.001</i> )  | <b>.23</b><br>( <i>&lt;.001</i> )  | <b>.16</b><br>(.005)               | <b>-.22</b><br>( <i>&lt;.001</i> ) | .05<br>(.365)                      | .04<br>(.461)  | -                                 |                      |                                   |                                   |
| (9) Geschlecht (männlich)            | <b>.12</b><br>(.036)               | <b>.31</b><br>( <i>&lt;.001</i> )  | <b>.30</b><br>( <i>&lt;.001</i> )  | <b>.32</b><br>( <i>&lt;.001</i> )  | <b>-.29</b><br>( <i>&lt;.001</i> ) | <b>.22</b><br>( <i>&lt;.001</i> )  | -.06<br>(.280) | <b>.11</b> <sup>†</sup><br>(.050) | -                    |                                   |                                   |
| (10) TPL Explorationsintensität      | <b>.12</b><br>(.043)               | .06<br>(.325)                      | .06<br>(.318)                      | .07<br>(.259)                      | -.05<br>(.367)                     | -.04<br>(.482)                     | -.03<br>(.596) | <b>.31</b><br>( <i>&lt;.001</i> ) | .08<br>(.178)        | -                                 |                                   |
| (11) TPL Explorationsvollständigkeit | <b>.15</b><br>(.010)               | <b>.12</b><br>(.047)               | <b>.12</b><br>(.043)               | .10<br>(.100)                      | <b>-.14</b><br>(.020)              | -.01<br>(.860)                     | -.03<br>(.594) | <b>.45</b><br>( <i>&lt;.001</i> ) | <b>.12</b><br>(.048) | <b>.78</b><br>( <i>&lt;.001</i> ) | -                                 |
| (12) TPL Steuerungsleistung          | <b>.18</b><br>(.002)               | <b>.23</b><br>( <i>&lt;.001</i> )  | <b>.23</b><br>( <i>&lt;.001</i> )  | <b>.17</b><br>(.003)               | <b>-.21</b><br>( <i>&lt;.001</i> ) | .04<br>(.476)                      | -.02<br>(.800) | <b>.49</b><br>( <i>&lt;.001</i> ) | <b>.12</b><br>(.033) | <b>.43</b><br>( <i>&lt;.001</i> ) | <b>.59</b><br>( <i>&lt;.001</i> ) |

Anmerkungen: Statistisch signifikante Ergebnisse sind fett gedruckt. SWE = Selbstwirksamkeitserleben, TPL = technisches Problemlösen.

## Elektronisches Supplement 5. Korrelationen und ergänzende Regressionsanalysen

<sup>1</sup> Der gefundene schwache Zusammenhang zwischen fluider Intelligenz und dem Geschlecht soll an dieser Stelle kurz kommentiert werden. Wir weisen darauf hin, dass diese Korrelation nicht überinterpretiert werden sollte. Der eingesetzte CFT 20-R erfasst primär den Bereich der visuell-räumlichen Wahrnehmung mit figural bildhaften Materialien (Jacobs & Petermann, 2007). Es ist bekannt, dass männliche Probanden in dieser kognitiven Subdomäne einen Vorteil haben (Rahe, Ruthsatz, Jansen & Quaiser-Pohl, 2018). Eine alternative Erklärung kann eine stärkere Vorselektion männlicher Probanden betreffen. So zeigen Studien (Voyer & Voyer, 2014), dass Schüler bei gleicher Leistung strenger benotet werden und weniger häufig das Abitur ablegen als Schülerinnen (Statistisches Bundesamt [Destatis], 2022). Bei Studenten könnte es sich folglich um eine stärker hinsichtlich ihrer Leistungsfähigkeit vorselektierten Stichprobe als bei Studentinnen handeln.

### Referenzen

- Jacobs, C. & Petermann, F. (2007). Grundintelligenztest (CFT 20-R) von Rudolf Weiß (2006). *Diagnostica*, 53(2), 109–113. <https://doi.org/10.1026/0012-1924.53.2.109>
- Rahe, M., Ruthsatz, V., Jansen, P. & Quaiser-Pohl, C. (2018). Different practice effects for males and females by psychometric and chronometric mental-rotation tests. *Journal of Cognitive Psychology*, 31(1), 92–103. <https://doi.org/10.1080/20445911.2018.1561702>
- Statistisches Bundesamt. (2022). *Absolventen und Abgänger: Deutschland, Schuljahr, Geschlecht, Schulart, Schulabschlüsse*. Verfügbar unter: <https://www-genesis.destatis.de/genesis/online?operation=previous&levelindex=1&step=1&titel=Ergebnis&levelid=1649420623289&acceptscookies=false#abreadcrumb>
- Voyer, D. & Voyer, S. D. (2014). Gender differences in scholastic achievement: a meta-analysis. *Psychological Bulletin*, 140(4), 1174–1204. <https://doi.org/10.1037/a0036620>

## Elektronisches Supplement 5. Korrelationen und ergänzende Regressionsanalysen

**ESM Tabelle 5.2.** Ergebnisse der Regressionsanalysen von der abhängigen Variablen *Explorationsintensität* auf die Personenmerkmale allgemeine Selbstwirksamkeitserwartungen, externale Kontrollüberzeugungen, Intelligenz, Geschlecht und technikbezogene Einstellungen und Selbstwahrnehmungen. Die TEiSel-Facetten wurden einzeln aufgenommen.

|                       | Modell 1     |            |                 |            | Modell 2     |            |                 |            | Modell 3     |            |                 |            | Modell 4     |            |                 |            | Modell 5     |            |                 |            |
|-----------------------|--------------|------------|-----------------|------------|--------------|------------|-----------------|------------|--------------|------------|-----------------|------------|--------------|------------|-----------------|------------|--------------|------------|-----------------|------------|
|                       | <i>B</i>     | <i>SE</i>  | <i>p</i>        | $\beta$    |
| Intercept             | <b>172.3</b> | <b>5.3</b> | <b>&lt;.001</b> |            | <b>172.0</b> | <b>5.4</b> | <b>&lt;.001</b> |            | <b>171.9</b> | <b>5.4</b> | <b>&lt;.001</b> |            | <b>172.3</b> | <b>5.4</b> | <b>&lt;.001</b> |            | <b>171.8</b> | <b>5.4</b> | <b>&lt;.001</b> |            |
| Allgemeine SWE        | -9.6         | 5.1        | .058            | -.12       | -8.4         | 5.2        | .104            | -.10       | -8.3         | 5.2        | .110            | -.10       | -8.8         | 5.1        | .085            | -.11       | -8.1         | 5.1        | .117            | -.10       |
| Kontrollüberzeugungen | -6.7         | 4.9        | .169            | -.08       | -6.7         | 4.9        | .171            | -.08       | -6.7         | 4.9        | .170            | -.08       | -7.0         | 5.0        | .158            | -.09       | -6.9         | 4.9        | .162            | -.09       |
| Intelligenz           | <b>24.4</b>  | <b>4.5</b> | <b>&lt;.001</b> | <b>.30</b> | <b>25.4</b>  | <b>4.8</b> | <b>&lt;.001</b> | <b>.32</b> | <b>25.5</b>  | <b>4.6</b> | <b>&lt;.001</b> | <b>.32</b> | <b>25.2</b>  | <b>4.5</b> | <b>&lt;.001</b> | <b>.31</b> | <b>25.7</b>  | <b>4.6</b> | <b>&lt;.001</b> | <b>.32</b> |
| Geschlecht            | 9.8          | 10.1       | .330            | .06        | 10.8         | 10.4       | .299            | .06        | 11.1         | 10.4       | .286            | .06        | 9.6          | 10.5       | .362            | .05        | 11.4         | 10.4       | .270            | .06        |
| Einstellung Technik   | 6.3          | 4.6        | .175            | .08        |              |            |                 |            |              |            |                 |            |              |            |                 |            |              |            |                 |            |
| Techn. Kompetenz      |              |            |                 |            | -0.3         | 4.9        | .959            | .00        |              |            |                 |            |              |            |                 |            |              |            |                 |            |
| Techn. SWE            |              |            |                 |            |              |            |                 |            | -0.8         | 5.0        | .871            | -.01       |              |            |                 |            |              |            |                 |            |
| Positiver Affekt      |              |            |                 |            |              |            |                 |            |              |            |                 |            | 1.8          | 4.8        | .711            | .02        |              |            |                 |            |
| Negativer Affekt      |              |            |                 |            |              |            |                 |            |              |            |                 |            |              |            |                 |            | 1.6          | 5.0        | .751            | .02        |
| <i>R</i> <sup>2</sup> |              |            |                 | .12        |              |            |                 | .11        |              |            |                 | .11        |              |            |                 | .11        |              |            |                 | .11        |

*Anmerkungen:* Statistisch signifikante Ergebnisse sind fett gedruckt.

## Elektronisches Supplement 5. Korrelationen und ergänzende Regressionsanalysen

**ESM Tabelle 5.3.** Ergebnisse der Regressionsanalysen von der abhängigen Variablen *Explorationsvollständigkeit* auf die Personenmerkmale allgemeine Selbstwirksamkeitserwartungen, externale Kontrollüberzeugungen, Intelligenz, Geschlecht und technikbezogene Einstellungen und Selbstwahrnehmungen. Die TEiSel-Facetten wurden einzeln aufgenommen.

|                       | Modell 1   |            |                 |            | Modell 2   |            |                 |            | Modell 3   |            |                 |            | Modell 4   |            |                 |            | Modell 5   |            |                 |            |
|-----------------------|------------|------------|-----------------|------------|------------|------------|-----------------|------------|------------|------------|-----------------|------------|------------|------------|-----------------|------------|------------|------------|-----------------|------------|
|                       | <i>B</i>   | <i>SE</i>  | <i>p</i>        | $\beta$    |
| Intercept             | <b>0.5</b> | <b>0.0</b> | <b>&lt;.001</b> |            |
| Allgemeine SWE        | 0.0        | 0.0        | .096            | -.10       | 0.0        | 0.0        | .142            | -.09       | 0.0        | 0.0        | .152            | -.09       | 0.0        | 0.0        | .143            | -.09       | 0.0        | 0.0        | .128            | -.09       |
| Kontrollüberzeugungen | 0.0        | 0.0        | .165            | -.08       | 0.0        | 0.0        | .163            | -.08       | 0.0        | 0.0        | .167            | -.08       | 0.0        | 0.0        | .154            | -.08       | 0.0        | 0.0        | .190            | -.08       |
| Intelligenz           | <b>0.1</b> | <b>0.0</b> | <b>&lt;.001</b> | <b>.43</b> | <b>0.1</b> | <b>0.0</b> | <b>&lt;.001</b> | <b>.44</b> |
| Geschlecht            | 0.0        | 0.0        | .179            | .07        | 0.0        | 0.0        | .191            | .07        | 0.0        | 0.0        | .177            | .07        | 0.0        | 0.0        | .202            | .07        | 0.0        | 0.0        | .202            | .07        |
| Einstellung Technik   | 0.0        | 0.0        | .126            | .08        |            |            |                 |            |            |            |                 |            |            |            |                 |            |            |            |                 |            |
| Techn. Kompetenz      |            |            |                 |            | 0.0        | 0.0        | .718            | .02        |            |            |                 |            |            |            |                 |            |            |            |                 |            |
| Techn. SWE            |            |            |                 |            |            |            |                 |            | 0.0        | 0.0        | .830            | .01        |            |            |                 |            |            |            |                 |            |
| Positiver Affekt      |            |            |                 |            |            |            |                 |            |            |            |                 |            | 0.0        | 0.0        | .709            | .02        |            |            |                 |            |
| Negativer Affekt      |            |            |                 |            |            |            |                 |            |            |            |                 |            |            |            |                 |            | 0.0        | 0.0        | .556            | -.03       |
| <i>R</i> <sup>2</sup> |            |            |                 | .22        |            |            |                 | .21        |            |            |                 | .21        |            |            |                 | .21        |            |            |                 | .21        |

*Anmerkungen:* Statistisch signifikante Ergebnisse sind fett gedruckt.

## Elektronisches Supplement 5. Korrelationen und ergänzende Regressionsanalysen

**ESM Tabelle 5.4.** Ergebnisse der Regressionsanalysen von der abhängigen Variablen *Steuerungsleistung* auf die Personenmerkmale allgemeine Selbstwirksamkeitserwartungen, externale Kontrollüberzeugungen, Intelligenz, Geschlecht, Explorationsintensität, Explorationsvollständigkeit und technikbezogene Einstellungen und Selbstwahrnehmungen. Die TEiSel-Facetten wurden einzeln aufgenommen.

|                             | Modell 1   |            |                 |            | Modell 2   |            |                 |            | Modell 3   |            |                 |            | Modell 4   |            |                 |            | Modell 5   |            |                 |            |
|-----------------------------|------------|------------|-----------------|------------|------------|------------|-----------------|------------|------------|------------|-----------------|------------|------------|------------|-----------------|------------|------------|------------|-----------------|------------|
|                             | <i>B</i>   | <i>SE</i>  | <i>p</i>        | $\beta$    |
| Intercept                   | 0.0        | 0.0        | .715            |            | 0.0        | 0.0        | .961            |            | 0.0        | 0.0        | .919            |            | 0.0        | 0.0        | .890            |            | 0.0        | 0.0        | .851            |            |
| Allgemeine SWE              | 0.0        | 0.0        | .826            | .01        | 0.0        | 0.0        | .848            | -.01       | 0.0        | 0.0        | .890            | -.01       | 0.0        | 0.0        | .870            | .01        | 0.0        | 0.0        | .982            | .00        |
| Kontrollüberzeugungen       | 0.0        | 0.0        | .969            | .00        | 0.0        | 0.0        | .904            | -.01       | 0.0        | 0.0        | .990            | .00        | 0.0        | 0.0        | .784            | -.01       | 0.0        | 0.0        | .871            | .01        |
| Intelligenz                 | <b>0.2</b> | <b>0.0</b> | <b>&lt;.001</b> | <b>.27</b> | <b>0.2</b> | <b>0.0</b> | <b>&lt;.001</b> | <b>.26</b> | <b>0.2</b> | <b>0.0</b> | <b>&lt;.001</b> | <b>.26</b> | <b>0.2</b> | <b>0.0</b> | <b>&lt;.001</b> | <b>.27</b> | <b>0.2</b> | <b>0.0</b> | <b>&lt;.001</b> | <b>.26</b> |
| Geschlecht                  | 0.0        | 0.1        | .510            | .03        | 0.0        | 0.1        | .930            | .00        | 0.0        | 0.1        | .857            | .01        | 0.0        | 0.1        | .807            | .01        | 0.0        | 0.1        | .737            | .02        |
| Explorationsintensität      | 0.0        | 0.1        | .471            | -.05       | 0.0        | 0.1        | .528            | -.05       | 0.0        | 0.1        | .524            | -.05       | 0.0        | 0.1        | .475            | -.05       | 0.0        | 0.1        | .560            | -.04       |
| Explorationsvollständigkeit | <b>0.3</b> | <b>0.1</b> | <b>&lt;.001</b> | <b>.50</b> | <b>0.3</b> | <b>0.1</b> | <b>&lt;.001</b> | <b>.49</b> | <b>0.3</b> | <b>0.1</b> | <b>&lt;.001</b> | <b>.50</b> | <b>0.3</b> | <b>0.1</b> | <b>&lt;.001</b> | <b>.50</b> | <b>0.3</b> | <b>0.1</b> | <b>&lt;.001</b> | <b>.49</b> |
| Einstellung Technik         | 0.0        | 0.0        | .249            | .05        |            |            |                 |            |            |            |                 |            |            |            |                 |            |            |            |                 |            |
| Techn. Kompetenz            |            |            |                 |            | <b>0.1</b> | <b>0.0</b> | <b>.010</b>     | <b>.13</b> |            |            |                 |            |            |            |                 |            |            |            |                 |            |
| Techn. SWE                  |            |            |                 |            |            |            |                 |            | <b>0.1</b> | <b>0.0</b> | <b>.022</b>     | <b>.11</b> |            |            |                 |            |            |            |                 |            |
| Positiver Affekt            |            |            |                 |            |            |            |                 |            |            |            |                 |            | 0.1        | 0.0        | .107            | .08        |            |            |                 |            |
| Negativer Affekt            |            |            |                 |            |            |            |                 |            |            |            |                 |            |            |            |                 |            | -0.1       | 0.0        | .086            | -.09       |
| <i>R</i> <sup>2</sup>       |            |            |                 | .42        |            |            |                 | .43        |            |            |                 | .42        |            |            |                 | .42        |            |            |                 | .42        |

*Anmerkungen:* Statistisch signifikante Ergebnisse sind fett gedruckt.
