# Supplementary material for: Entwicklung eines Fragebogens zur ökonomischen Erfassung technikbezogener Einstellungen und Selbstwahrnehmungen
Source: Atypon-hosted journal article supplement (doi:10.1026/0012-1924/a000323), 2023-09-18
Supplement: 0012-1924_a000323_esm6.pdf [file 0012-1924_a000323_esm6.pdf]

## Elektronisches Supplement 6. Messinvarianzanalysen

Zur Überprüfung, ob Gruppenunterschiede in den TEiSel-Facetten bedeutsam interpretiert werden können, wurden Messinvarianzanalysen vorgenommen. Die Messinvarianz wurde für die Variable *Geschlecht* und explorativ für eine dichotomisierte Altersvariable untersucht. Zur Durchführung sind wir dem Multi-Gruppen CFA-Ansatz gefolgt (Cheung & Rensvold, 2002; Vandenberg & Lance, 2000; für eine Diskussion über aktuelle Ansätze und Entwicklungen, siehe Avvisati, Le Donné & Paccagnella, 2019).

Bezogen auf die Variable *Geschlecht* sprechen die Ergebnisse zunächst für eine metrische Invarianz (siehe ESM Tabelle 6.1). Sofern zwei Items aus der Skala „technikbezogenes Kompetenzerleben“ (KE03, KE04), vier Items aus der Skala „positiver Affekt“ (PA01, PA02, PA03, PA06) und ein Item aus der Skala „negativer Affekt“ (NA03) für beide Gruppen frei geschätzt werden, kann zumindest eine partielle skalare Messinvarianz für die anderen Skalen angenommen werden.

**ESM Tabelle 6.1.** Ergebnisse der Messinvarianzanalysen für die Variable *Geschlecht*.

| Modell                        | AIC          | BIC          | RMSEA       | CFI         | $\chi^2$ | df  |         | $\Delta\chi^2$ | $\Delta df$ | p     |
|-------------------------------|--------------|--------------|-------------|-------------|----------|-----|---------|----------------|-------------|-------|
| 1 Konfigurale Invarianz       | 18827        | 19454        | .061        | <b>.900</b> | 820.94   | 530 |         |                |             |       |
| 2 Metrische Invarianz         | 18811        | 19346        | <b>.060</b> | .897        | 855.06   | 555 | 2 vs. 1 | 34.12          | 25          | .105  |
| 3 Skalare Invarianz           | 18823        | 19285        | .062        | .886        | 907.23   | 575 | 3 vs. 2 | 52.17          | 20          | <.001 |
| 4 Partielle skalare Invarianz | <b>18807</b> | <b>19294</b> | .061        | .894        | 876.31   | 568 | 4 vs. 2 | 21.25          | 13          | .068  |

*Anmerkungen:* Für AIC, BIC, RMSEA und CFI sind die besten Werte fett gedruckt.

Problematisch ist bei unseren Analysen allerdings, dass die Kovarianzmatrix für die Gruppe der männlichen Probanden nicht positiv definit ist. Die Betrachtung der standardisierten latenten Kovarianzmatrizen für beide Gruppen (ESM Tabelle 6.2) zeigt zwar keinen Wert über eins an, aber einer der Eigenwerte der Kovarianzmatrix der Gruppe männlicher Probanden ist negativ. Dieser Umstand kann für eine Missspezifikation des Modells bzw. gegen eine konfigurale Invarianz sprechen. Er könnte aber auch der geringen Stichprobengröße der Gruppe männlicher Probanden geschuldet sein ( $n = 86$  Beobachtungen für die Schätzung eines fünffaktoriellen Modells mit 60 Parametern).

## Elektronisches Supplement 6. Messinvarianzanalysen

**ESM Tabelle 6.2.** Kovarianzmatrizen der latenten Variablen nach Geschlecht.

|                                       | weiblich          |      |      |      |     | männlich          |      |      |      |     |
|---------------------------------------|-------------------|------|------|------|-----|-------------------|------|------|------|-----|
|                                       | (1)               | (2)  | (3)  | (4)  | (5) | (1)               | (2)  | (3)  | (4)  | (5) |
| (1) Einstellung gegenüber Technik     | -                 |      |      |      |     | -                 |      |      |      |     |
| (2) Tech. Kompetenzerleben            | .22 <sup>a</sup>  | -    |      |      |     | .67               | -    |      |      |     |
| (3) Tech. Selbstwirksamkeitserwartung | .28 <sup>b</sup>  | .93  | -    |      |     | .50 <sup>b</sup>  | .98  | -    |      |     |
| (4) Positiver Affekt                  | .38               | .72  | .67  | -    |     | .52 <sup>b</sup>  | .83  | .76  | -    |     |
| (5) Negativer Affekt                  | -.26 <sup>a</sup> | -.74 | -.73 | -.46 | -   | -.47 <sup>a</sup> | -.81 | -.96 | -.70 | -   |

Anmerkungen: <sup>a</sup> $p < .05$ ; <sup>b</sup> $p < .01$ . Alle anderen Parameterschätzungen sind signifikant auf dem Niveau  $p < .001$ .

Bezogen auf die Variable *Alter* haben wir die Stichprobe anhand des Medians der Altersvariable aufgeteilt (Gruppe 1:  $n = 151$ ; Gruppe 2:  $n = 145$ ). Die daraus entstandenen Altersgruppen unterscheiden sich im Durchschnitt um fünf Jahre ( $M_{\text{Gruppe.1}} = 20.9$  Jahre vs.  $M_{\text{Gruppe.2}} = 25.8$  Jahre), wobei die erste Gruppe altershomogener als die zweite Gruppe ist ( $SD_{\text{Gruppe.1}} = 0.9$  Jahre vs.  $SD_{\text{Gruppe.2}} = 3.4$  Jahre). Die anschließenden Invarianzanalysen zeigen, dass unsere Daten die Annahme residualer Messinvarianz für die beiden Altersgruppen unterstützen (siehe ESM Tabelle 6.3).

**ESM Tabelle 6.3.** Ergebnisse der Messinvarianzanalysen zwischen zwei Altersgruppen.

| Modell                  | AIC          | BIC          | RMSEA       | CFI         | $\chi^2$ | $df$ | $\Delta\chi^2$ | $\Delta df$ | $p$     |
|-------------------------|--------------|--------------|-------------|-------------|----------|------|----------------|-------------|---------|
| 1 Konfigurale Invarianz | 18961        | 19589        | .051        | .934        | 731.26   | 530  |                |             |         |
| 2 Metrische Invarianz   | 18928        | 19463        | .048        | <b>.937</b> | 747.42   | 555  | 2 vs. 1        | 16.16       | 25 .910 |
| 3 Skalare Invarianz     | 18915        | 19376        | .048        | .935        | 774.67   | 575  | 3 vs. 2        | 27.25       | 20 .128 |
| 4 Residuale Invarianz   | <b>18883</b> | <b>19252</b> | <b>.047</b> | <b>.937</b> | 793.25   | 600  | 4 vs. 3        | 18.58       | 25 .817 |

Anmerkungen: Für AIC, BIC, RMSEA und CFI sind die besten Werte fett gedruckt.

## Elektronisches Supplement 6. Messinvarianzanalysen

### Referenzen

- Avvisati, F., Le Donne, N. & Paccagnella, M. (2019). A meeting report: cross-cultural comparability of questionnaire measures in large-scale international surveys. *Measurement Instruments for the Social Sciences*, 1(8). <https://doi.org/10.1186/s42409-019-0010-z>
- Cheung, G. W. & Rensvold, R. B. (2002). Evaluating Goodness-of-Fit Indexes for Testing Measurement Invariance. *Structural Equation Modeling*, 9(2), 233–255.
- Vandenberg, R. J. & Lance, C. E. (2000). A Review and Synthesis of the Measurement Invariance Literature: Suggestions, Practices, and Recommendations for Organizational Research. *Organizational Research Methods*, 3(1), 4–70.  
<https://doi.org/10.1177/109442810031002>
