# Supplementary material for: Entwicklung eines Fragebogens zur ökonomischen Erfassung technikbezogener Einstellungen und Selbstwahrnehmungen
Source: Atypon-hosted journal article supplement (doi:10.1026/0012-1924/a000323), 2023-09-18
Supplement: 0012-1924_a000323_esm7.pdf [file 0012-1924_a000323_esm7.pdf]

## Elektronisches Supplement 7. Zusatzanalysen

**ESM Tabelle 7.1.** Ergebnisse der Regression der latenten TEiSel-Faktoren auf die manifesten Variablen Intelligenz und Geschlecht.

|                                                 | Intelligenz |           |         |          |     | Geschlecht |           |         |          | $R^2$ |     |
|-------------------------------------------------|-------------|-----------|---------|----------|-----|------------|-----------|---------|----------|-------|-----|
|                                                 | <i>B</i>    | <i>SE</i> | $\beta$ | <i>p</i> |     | <i>B</i>   | <i>SE</i> | $\beta$ | <i>p</i> |       |     |
| <i>Abhängige latente Variable</i>               |             |           |         |          |     |            |           |         |          |       |     |
| (1) Einstellung gegenüber Technik               | 0.06        | 0.03      | .17     | .028     | *   | 0.05       | 0.06      | .07     | .375     |       | .04 |
| (2) Technikbezogenes Kompetenzerleben           | 0.12        | 0.05      | .16     | .006     | **  | 0.49       | 0.10      | .28     | <.001    | ***   | .12 |
| (3) Technikbezogene Selbstwirksamkeitserwartung | 0.17        | 0.05      | .22     | <.001    | *** | 0.44       | 0.10      | .26     | <.001    | ***   | .13 |
| (4) Positiver Affekt                            | 0.10        | 0.05      | .11     | .066     |     | 0.62       | 0.12      | .33     | <.001    | ***   | .13 |
| (5) Negativer Affekt                            | -0.10       | 0.03      | -.19    | .003     | **  | -0.31      | 0.07      | -.27    | <.001    | ***   | .12 |

Anmerkung:  $\chi^2(305) = 484.24, p < .001$ ; RMSEA = .045; SRMR = .048; CFI = .941.
